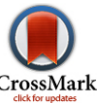

# Effect of Treatment of Obstructive Sleep Apnea on Depressive Symptoms: Systematic Review and Meta-Analysis

Marcus Povitz<sup>1,2,3</sup>, Carmelle E. Bolo<sup>1,3</sup>, Steven J. Heitman<sup>1,3</sup>, Willis H. Tsai<sup>1,3</sup>, JianLi Wang<sup>1,4</sup>, Matthew T. James<sup>1,3\*</sup>

**1** Department of Community Health Sciences, University of Calgary, Calgary, Alberta, Canada, **2** Department of Medicine, Western University, London, Ontario, Canada, **3** Department of Medicine, University of Calgary, Calgary, Alberta, Canada, **4** Department of Psychiatry, University of Calgary, Calgary, Alberta, Canada

## Abstract

**Background:** Obstructive sleep apnea (OSA) is associated with increased morbidity and mortality, and decreased quality of life. Treatment with continuous positive airway pressure (CPAP) or mandibular advancement devices (MADs) is effective for many symptoms of OSA. However, it remains controversial whether treatment with CPAP or MAD also improves depressive symptoms.

**Methods and Findings:** We performed a systematic review and meta-analysis of randomized controlled trials that examined the effect of CPAP or MADs on depressive symptoms in patients with OSA. We searched Medline, EMBASE, the Cochrane Central Registry of Controlled Trials, and PsycINFO from the inception of the databases until August 15, 2014, for relevant articles. In a random effects meta-analysis of 19 identified trials, CPAP treatment resulted in an improvement in depressive symptoms compared to control, but with significant heterogeneity between trials ( $Q$  statistic,  $p < 0.001$ ;  $I^2 = 71.3\%$ , 95% CI: 54%, 82%). CPAP treatment resulted in significantly greater improvement in depressive symptoms in the two trials with a higher burden of depression at baseline (meta-regression,  $p < 0.001$ ). The pooled standardized mean difference (SMD) in depressive symptoms with CPAP treatment in these two trial populations with baseline depression was 2.004 (95% CI: 1.387, 2.621), compared to 0.197 (95% CI: 0.059, 0.334) for 15 trials of populations without depression at baseline. Pooled estimates of the treatment effect of CPAP were greater in parallel arm trials than in crossover trials (meta-regression,  $p = 0.076$ ). Random effects meta-analysis of five trials of MADs showed a significant improvement in depressive symptoms with MADs versus controls: SMD = 0.214 (95% CI: 0.026, 0.401) without significant heterogeneity ( $I^2 = 0\%$ , 95% CI: 0%, 79%). Studies were limited by the use of depressive symptom scales that have not been validated specifically in people with OSA.

**Conclusions:** CPAP and MADs may be useful components of treatment of depressive symptoms in individuals with OSA and depression. The efficacy of CPAP and MADs compared to standard therapies for depression is unknown.

Please see later in the article for the Editors' Summary.

**Citation:** Povitz M, Bolo CE, Heitman SJ, Tsai WH, Wang J, et al. (2014) Effect of Treatment of Obstructive Sleep Apnea on Depressive Symptoms: Systematic Review and Meta-Analysis. PLoS Med 11(11): e1001762. doi:10.1371/journal.pmed.1001762

**Academic Editor:** Phillipa J. Hay, University of Western Sydney, Australia

**Received:** April 22, 2014; **Accepted:** October 17, 2014; **Published:** November 25, 2014

**Copyright:** © 2014 Povitz et al. This is an open-access article distributed under the terms of the Creative Commons Attribution License, which permits unrestricted use, distribution, and reproduction in any medium, provided the original author and source are credited.

**Data Availability:** The authors confirm that all data underlying the findings are fully available without restriction. All relevant data is contained within the paper.

**Funding:** SJ Heitman is supported by an award from the N.B. Hershfield Professorship in Therapeutic Endoscopy. M Povitz is supported by an award from the Western Regional Training Centre for Health Services Research. The authors received no specific funding for this work.

**Competing Interests:** The authors have declared that no competing interests exist.

**Abbreviations:** AHI, apnea hypopnea index; BDI, Beck Depression Inventory; BSI, Brief Symptom Inventory; CESD, Center for Epidemiologic Studies Depression Scale; CPAP, continuous positive airway pressure; GDS, Geriatric Depression Scale; HADS, Hospital Anxiety and Depression Scale; HADSd, Hospital Anxiety and Depression Scale depression subscale; MAD, mandibular advancement device; MADRS, Montgomery-Asberg Depression Rating Scale; ODI, oxygen desaturation index; OSA, obstructive sleep apnea; POMSd, Profile of Mood States depression subscale; RCT, randomized controlled trial; RDI, respiratory disturbance index; SF-36, Short Form-36; SF-36 MCS, Short Form-36 mental component score; SF-36 MH, Short Form-36 mental health survey; SMD, standardized mean difference; WMD, weighted mean difference.

\* Email: mjames@ucalgary.ca

These authors contributed equally to this work.

## Introduction

Obstructive sleep apnea (OSA), characterized by repetitive upper airway obstruction during sleep, is associated with increased morbidity and mortality and decreased quality of life [1,2]. OSA has multiple mechanisms that ultimately lead to airflow limitation, intermittent hypoxia, and arousal from sleep [3]. OSA is associated with poor-quality sleep, insomnia, and neurocognitive symptoms of poor memory and irritability [4]. Poor sleep, fatigue, and cognitive impairment are also common in depression. Depression is highly prevalent in individuals with OSA, with some studies reporting that up to 63% of individuals are affected [5]. Previous studies have attempted to quantify the strength of the associations between excessive sleepiness, depression, and OSA, and have suggested that depression, rather than OSA, may be more strongly associated with excessive sleepiness [6]. OSA may cause depression on the basis of sleep loss, sleep disruption, and cognitive changes induced by intermittent hypoxemia, while weight gain and sleep disruption due to depression could cause or worsen OSA [5].

Treatment with continuous positive airway pressure (CPAP) is effective for all degrees of OSA [7], and has been shown to reduce excessive sleepiness as well as adverse events related to other medical conditions [8–10]. Commonly used and effective alternatives to CPAP in individuals with mild to moderate OSA are mandibular advancement devices (MADs). These devices, though less effective than CPAP, are better tolerated by many individuals with OSA and may offer similar reductions in sleepiness [11]. However, it remains controversial whether treatment with CPAP or MADs also improves depressive symptoms.

The effect of treatment of sleep apnea on depressive symptoms has been evaluated in a number of trials; however, results have been equivocal [7]. The last systematic review that addressed this question concluded that the effects of OSA treatment on depressive symptoms were limited and inconsistent between trials because of a high level of heterogeneity. However, this previous review was limited to studies of CPAP that used the Hospital Anxiety and Depression Scale (HADS). Therefore, the objective of the present systematic review was to comprehensively examine the effects of CPAP and MADs on depressive symptoms across various depression questionnaires in adults with OSA. We hypothesized that the study design (i.e., use of crossover versus parallel arm design), choice of depression scale, baseline prevalence of depression in the trial population, and treatment duration would explain the previously reported heterogeneity in treatment effects on depressive symptoms in OSA. Additionally, we sought to examine the effect of MAD therapy on depressive symptoms.

## Methods

This study was performed using a prespecified protocol. All measures of reporting and assessment are based on the Preferred Reporting Items for Systematic Reviews and Meta-analyses (PRISMA) statement [12].

### Inclusion/Exclusion Criteria

We included all randomized controlled trials (RCTs) of CPAP or MADs performed in adults aged 18 y and older with OSA that also measured depressive symptoms. We included trials if they reported a diagnosis of sleep apnea based on sleep study results that showed an apnea hypopnea index (AHI), respiratory disturbance index (RDI), or oxygen desaturation index (ODI) > 5 events/hour; trials that used only questionnaires for diagnosis of OSA were excluded. A diagnosis of depression at baseline was not

required; however, included trials required measurement of depressive symptoms using a validated depression questionnaire. These included the Beck Depression Inventory (BDI) [13], the Hospital Anxiety and Depression Scale depression subscale (HADSd) [14], the Montgomery-Asberg Depression Rating Scale (MADRS) [15], the Profile of Mood States depression subscale (POMSd) [16], the Geriatric Depression Scale (GDS) [17], the Brief Symptom Inventory (BSI) [18], the Center for Epidemiologic Studies Depression Scale (CESD) [19], and two subscales of the Short Form-36 (SF-36): SF-36 mental component score (SF-36 MCS) and SF-36 mental health (SF-36 MH) [20]. Trials investigating populations with co-morbid bipolar disorder, schizophrenia, or other psychiatric diagnoses were excluded. We did not limit trials by publication language or date.

### Data Sources and Searches

We searched four online databases: Medline, EMBASE (Excerpta Medica Database), the Cochrane Central Registry of Controlled Trials, and PsycINFO from the date of inception of the databases up until August 15, 2014. We also searched abstracts from the previous three years of the Associated Professional Sleep Societies conferences, the American Thoracic Society conferences, and the American Psychiatric Association conferences. This was done using electronic word searching tools using the same key words applied to online databases. Finally, two individuals (M. P. and C. E. B.) searched the reference lists of identified relevant publications. Experts in the field were contacted regarding information concerning unpublished studies and ongoing trials.

We searched each online database using common terms related to three major themes as subject headings or keywords in the title or abstract. The list of specific search terms for each online database is presented in Table S1. The first theme included terms relating to the population of adults with OSA. The second theme was related to the intervention of either CPAP or MADs. The third theme was related to study design, and was limited to RCTs. The appropriate Cochrane Collaboration filters were used to search for RCTs within each of the specific databases [21]. Finally, we combined the results of the three search themes using the Boolean operator “and” to identify trials possessing all specified criteria. Terms relating to “depression” as an outcome measure were not included in order to maximize the sensitivity of the search and to ensure that all trials involving CPAP or MAD treatment in OSA were identified, including those where depression was a secondary outcome.

### Study Selection

Both individuals (M. P. and C. E. B.) initially screened all identified abstracts for further review by verifying that the trial contained original data and was relevant to the research question (i.e., involved CPAP or MAD treatment in OSA patients, included a measure of depression, and included a control group). The initial screen was broad in an effort to capture all relevant literature. From the initial abstract screening, articles were reviewed further if M. P. or C. E. B. decided that full-text review was necessary. For these full-text articles, eligibility for inclusion in the systematic review was considered if they addressed all elements of our research question. Trials were included in the meta-analysis if they reported mean change and standard deviation of the change in depression score or pre- and post-intervention depression scores in both the treatment and control groups, or if sufficient data were presented to calculate the mean change and standard deviation of the change in depression score. Missing standard deviations were calculated from *p*-values or *t*-scores or were imputed using correlation coefficients generated from studies of similar design

and duration, according to methods described in the *Cochrane Handbook for Systematic Reviews of Interventions* [22]. Where insufficient data were presented, the corresponding authors were contacted for additional information.

### Data Extraction and Quality Assessment:

A data extraction form was used to collect information from each identified trial. Data was extracted in duplicate by the investigators (M. P. and C. E. B.), and disagreement was resolved by consensus. There were eight different depression scales (counting the two SF-36 subscales as one) used across studies, with several studies reporting multiple scales. The detail of reporting did not always allow for extraction of all included scales for each study, but where possible, all results were extracted for possible synthesis. The quality of each study was assessed based on components of the Cochrane risk of bias tool [23].

### Data Synthesis and Analysis

The primary outcome measure was the mean difference between treatment and control groups in the change in depression scores from baseline to the end of the trial. In order to maintain a consistent direction of effect between different depression scales [22], we reversed the direction of change scores where necessary so that positive values corresponded to improvement in depression for all trials. Studies that compared three arms (placebo, CPAP, and MADs) were identified in the systematic review; however, only results from comparisons between CPAP and control or MADs and control were included in meta-analyses.

In order to compare results across trials that used different scales for depressive symptoms, we pooled the standardized mean difference (SMD) using the random effects model of DerSimonian and Laird [22]. We chose a random effects model to generalize our results to the variety of populations studied with OSA. Analyses were performed separately based on treatment method (CPAP or MAD). For the purposes of the meta-analysis of the SMDs, we included each trial only once and preferentially included the scale used by each trial that was most specific to depression, rather than the SF-36 MH score, wherever possible. We performed random effects meta-analysis using the pooled weighted mean difference (WMD) if there were two or more trials that used a common depression scale. We performed stratified meta-analyses and meta-regression on seven different study-level characteristics that we specified a priori as potential sources of significant heterogeneity. These included RCT design type (parallel or crossover), OSA severity (mild to moderate or severe), blinding of both patients and assessors (yes or no), trial length (< 4 wk, 4–8 wk, or 8+ wk), mean treatment adherence (<4 h/night or 4+ h/night), baseline depression based on established questionnaire cutoff values (SF-36 MCS, <42; SF-36 MH, <52; BDI, >14; HADSd, >8; BSI depression subscale, >0.28; POMSd, >23) [16,18,24–28], and type of depression measurement tool (SF-36 versus other). We considered an alpha = 0.10 as significant in meta-regression [29].

Funnel plots and Begg's test were used to assess for small study effects indicative of publication bias. STATA IC (STATA Corp College Station, Texas, US) was used for all statistical analysis, using the metan, metareg, metafunnel, heterogi, and metabias commands to generate pooled estimates and plots.

## Results

### Study Identification and Characteristics

Our systematic search identified 1,982 unique citations. No additional citations were discovered from conference proceedings.

Of the 1,982 articles, 50 were selected for full-text review. Our full-text review identified 24 RCTs, including 26 randomized comparisons evaluating the change in depressive symptoms from baseline to study end in response to either CPAP or MAD therapy in OSA patients (Figure 1). The kappa statistic for agreement between the two reviewers for inclusion was excellent:  $\kappa = 0.87$  (95% CI: 0.72–0.99).

All 24 RCTs identified were full-text articles published in peer-reviewed journals between 1998 and 2014 [30–53]. Eleven of the studies were published since the last systematic review on this topic was conducted [7]. Fifteen of the RCTs were parallel trials, while seven were crossover trials. Two trials had elements of both designs, but reported results at the end of the first treatment period, and therefore for the purposes of meta-analysis, the crossover component was ignored. Details of the study-level characteristics of all included trials are presented in Table 1. Six studies excluded individuals using antidepressant medications, and one study excluded individuals using benzodiazepines; the remainder of the studies did not report use of anti-depressant medications nor describe exclusion criteria based on their use. None of the studies reported initiation of antidepressant use during the study period. The mean age of participants ranged from 42 to 78 y, the proportion of men ranged from 46% to 100%, and the mean body mass index ranged from 24.7 to 42.5 kg/m<sup>2</sup>. There were 19 trials of CPAP treatment, three of MADs, and two trials of both treatments. The most common type of control was sham CPAP or sham MAD, although an oral placebo tablet, sham exercises, or no therapy was also used as a comparator (Table 1). The OSA severity of the study populations ranged from mild to severe, with mean RDI/ODI/AHI of 9.8–62.4 events/hour. Treatment length was from 1 to 24 wk, while mean adherence to treatment ranged from 2.3 to 7.7 h/night.

### Risk of Bias

The quality of included trials varied (Tables 2 and 3). Almost all trials reported inclusion and exclusion criteria; however, only 56% of the trials reported the method of randomization, and allocation concealment was not reported or not performed in 48% of cases. Approximately half of the trials blinded both patients and assessors. Baseline differences between the treatment and control groups were infrequent. The majority of trials reported on loss to follow-up, and more than half of the trials performed a power calculation (Tables 2 and 3). For the crossover trials, the washout period ranged from 7 to 28 d, with two trials having no washout period (Table 3).

### Efficacy of CPAP for Depression

We identified 21 trials that reported the effect of CPAP on depression symptoms, and 19 trials (1,355 participants in total) provided sufficient data for meta-analysis. The two excluded trials [40,48] did not provide results of depression questionnaire testing, though it was described in the methods. Supplemental information for these trials could not be obtained. In random effects meta-analysis, CPAP treatment resulted in an improvement in depressive symptoms compared to the control group: SMD = 0.312 (95% CI: 0.099, 0.525) ( $p = 0.004$ ) (Figure 2). There was significant heterogeneity between the trials ( $Q$  statistic,  $p < 0.001$ ;  $I^2 = 71.3\%$ , 95% CI: 54%, 82%), suggesting that much of the total variability in the pooled SMD could be attributed to between-trial heterogeneity.

The results of stratified analyses and meta-regression to explore reasons for the observed heterogeneity in the CPAP trials based on the seven study-level factors are presented in Table 4. Only two of the 21 comparisons included study populations with average

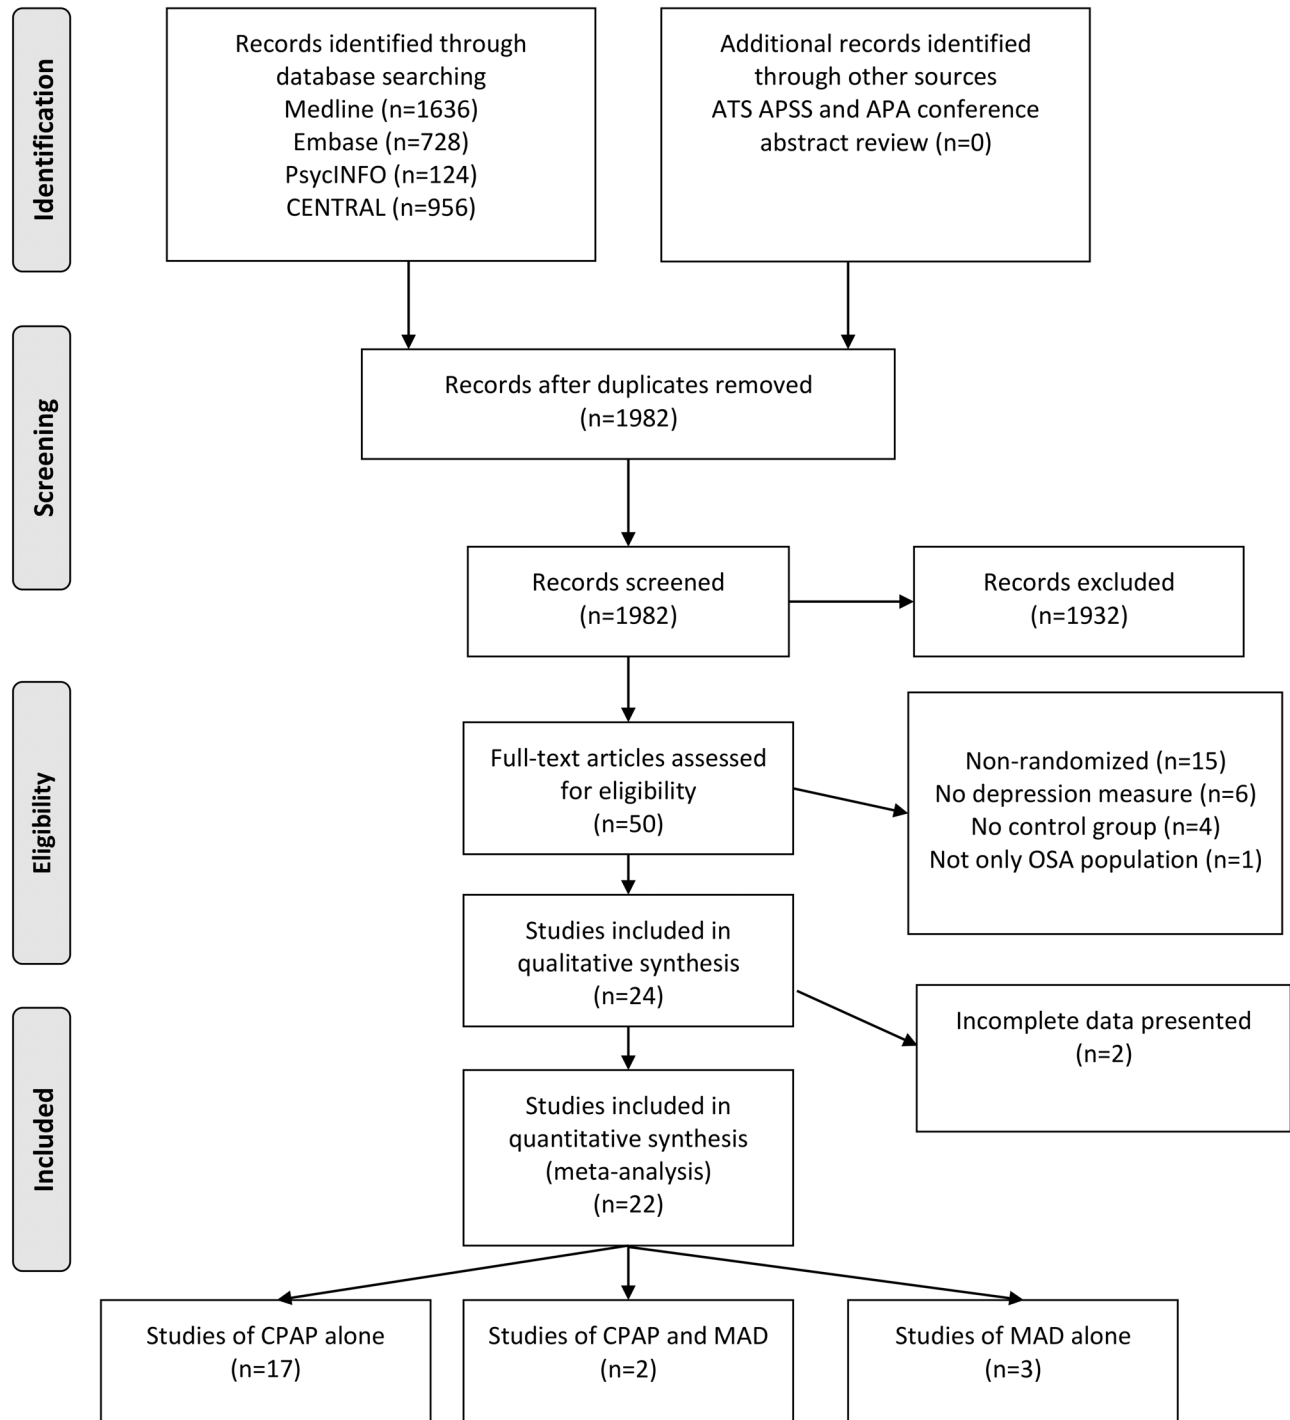

**Figure 1. PRISMA flow diagram** [12]. All medical databases were searched on the same date. Abstract, full-text review, and data extraction were conducted in duplicate by M. P. and C. E. B. APA, American Psychiatric Association; ATS, American Thoracic Society; APSS, Associated Professional Sleep Societies; CENTRAL, Cochrane Central Registry of Controlled Trials. doi:10.1371/journal.pmed.1001762.g001

baseline depression scores that met the depression cutoff according to the particular depression scale used (Table 1) [16,18,24–28]. The treatment effect of CPAP was significantly larger in populations whose mean baseline depression scores were above

the cutoff for depression. The pooled SMD from trials of study populations with baseline depression was 2.004 (95% CI: 1.387, 2.621), compared with 0.197 (95% CI: 0.059, 0.334) for study populations with baseline depression scores under the cutoff for

**Table 1.** Characteristics of included studies on the effect of CPAP or MADs on depression in patients with OSA.

| Study                                 | Number of Participants | Mean Age (Years)/<br>Percent Male | Mean AHI (Events/h) <sup>†</sup> | OSA Treatment Method | Mean Adherence in Treatment Arm (h/Night) | Control        | Mean Adherence in Control Arm (h/Night or Percent of Nights) | Depression Scale(s) (Mean Score) | Length of Trial (Weeks) |
|---------------------------------------|------------------------|-----------------------------------|----------------------------------|----------------------|-------------------------------------------|----------------|--------------------------------------------------------------|----------------------------------|-------------------------|
| Amin et al. 2011 [30]                 | 18                     | 42/100                            | 19                               | CPAP                 | 4.4                                       | Sham CPAP      | 4.4                                                          | SF-36 MCS (32.4)                 | 3                       |
| Bardwell et al. 2007* [31]            | 38                     | 45.9/87                           | RDI: 62.3                        | CPAP                 | 6.3                                       | Sham CPAP      | 6.0                                                          | BSI (0.29)                       | 2                       |
| Barnes et al. 2002 [32]               | 42                     | 45.5/83                           | 12.9                             | CPAP                 | 3.5                                       | Oral placebo   | 93%                                                          | BDI, SF-36 MH (72.5)             | 8                       |
| Barnes et al. 2004 [33]               | 114                    | 47/80                             | 21.3                             | CPAP and MAD         | CPAP: 3.6; MAD: 5.5                       | Oral placebo   | 94%                                                          | BDI (9.2)                        | 12                      |
| Bianco et al. 2005 [34]               | 24                     | 54.3/83                           | 28.9                             | MAD                  | 7.7                                       | Sham MAD       | 6.5                                                          | SF-36 MH (60.1)                  | 12                      |
| Craig et al. 2012 [35]                | 391                    | 57.8/78                           | ODI: 9.8                         | CPAP                 | 2.3                                       | Standard care  | NR                                                           | SF-36 MCS (48.2)                 | 24                      |
| Diaferia et al. 2013 [36]             | 51                     | 44.8/100                          | 31.3                             | CPAP                 | 3.6                                       | Sham exercises | NR                                                           | SF-36 MH                         | 12                      |
| Engleman et al. 1998 [37]             | 23                     | 47/91                             | 43                               | CPAP                 | 3.2                                       | Oral placebo   | NR                                                           | HADSd (5.7)                      | 4                       |
| Engleman et al. 1999 [38]             | 34                     | 44/62                             | 10                               | CPAP                 | 3.2                                       | Oral placebo   | NR                                                           | HADSd (7.4), SF-36               | 4                       |
| Haensel et al. 2007 [39]              | 50                     | 48.6/80                           | 61                               | CPAP                 | 6.6                                       | Sham CPAP      | 6                                                            | POMSd (7.2)                      | 2                       |
| Henke et al. 2001 [40]                | 46                     | 50.4/54                           | 65.1                             | CPAP                 | 5.9                                       | Sham CPAP      | 5.2                                                          | GDS                              | 1.9–5.4                 |
| Jenkinson et al. 1999* [41]           | 101                    | 49 <sup>§</sup> /100              | ODI: 30.7                        | CPAP                 | 5.4                                       | Sham CPAP      | 4.6                                                          | SF-36 MH (71)                    | 4                       |
| Lam et al. 2007 [42]                  | 101                    | 46/78                             | 21.4                             | CPAP and MAD         | CPAP: 4.2; MAD: 6.4                       | Standard Care  | NR                                                           | SF-36 (12.6)                     | 10                      |
| Lee et al. 2012* [43]                 | 71                     | 48.3/66                           | 34                               | CPAP                 | NR                                        | Sham CPAP      | NR                                                           | POMSd (12.5), CESD, BSI 3        | 3                       |
| Marshall et al. 2005* [44]            | 31                     | 50.5/76                           | 21.6                             | CPAP                 | 4.9                                       | Sham CPAP      | 4.9                                                          | HADS (4.2), SF-36                | 3                       |
| Montserrat et al. 2001 [45]           | 48                     | 54.2/91                           | 53.8                             | CPAP                 | 4.3                                       | Sham CPAP      | 4.5                                                          | SF-36 MH (71.83)                 | 6                       |
| Naismith et al. 2005* [46]            | 86                     | 48.4/81                           | 26.9                             | MAD                  | 6.7                                       | Sham MAD       | 6.7                                                          | BDI (5.8), POMSd                 | 4                       |
| Petri et al. 2008 [47]                | 93                     | 50/83                             | 34.7                             | MAD                  | NR                                        | Sham MAD       | NR                                                           | SF-36 MH (71)                    | 4                       |
| Redline et al. 1998 <sup>§</sup> [48] | 97                     | 48.7/52                           | RDI: 13.1                        | CPAP                 | 3.1                                       | Standard care  | 82%                                                          | POMSd (7.3)                      | 10                      |
| Ryan et al. 2011 [49]                 | 48                     | 61.8/79                           | 35.9                             | CPAP                 | 5.0                                       | Standard care  | NR                                                           | BDI (5.8)                        | 4                       |
| Sandberg et al. 2001 [50]             | 63                     | 77.5/46                           | 28                               | CPAP                 | 4.1                                       | Standard care  | NR                                                           | MADRS (21)                       | 4                       |
| Siccoli et al. 2008 [51]              | 102                    | 48.4/100                          | ODI: 42.3                        | CPAP                 | 4.7                                       | Sham CPAP      | 3.9                                                          | SF-36 MH (72.6)                  | 4                       |
| Smith et al. 2007 [52]                | 26                     | 61/88                             | 36                               | CPAP                 | 3.5                                       | Sham CPAP      | 3.3                                                          | SF-36 MH (78)                    | 6                       |
| Yu et al. 1999* <sup>§</sup> [53]     | 34                     | 48.2/76                           | RDI: 40.6                        | CPAP                 | 5.6                                       | Sham CPAP      | 5.2                                                          | POMSd (12.5)                     | 1                       |

Unless otherwise indicated, studies did not report medication or antidepressant use at baseline. No studies reported whether antidepressants were initiated during the course of the study. Cutoffs for depression scales: SF-36 MCS, <42; SF-36 MH, <52; BSI depression subscale, >0.28; BDI, >14; HADSd, >8; POMSd, >2.

<sup>†</sup>For ODI, the events were oxygen desaturations of 4% or greater.

\*Depression was a primary outcome.

#Study excluded use of psychotropics including antidepressants at baseline.

<sup>§</sup>Median age.

<sup>§</sup>Excluded use of benzodiazepines but not antidepressants.

NR, not reported.

doi:10.1371/journal.pmed.1001762.t001

**Table 2.** Assessment of bias of included parallel RCTs on the effect of CPAP or MAD on depression in patients with OSA.

| Study                        | Inclusion/Exclusion Specified | Method of Randomization Given | Allocation Concealment | Patients Blinded | Assessors Blinded | Reported Loss to Follow-Up | Baseline Difference between Groups | Power Calculation | Intention to Treat Analysis | Funding Source Disclosed |
|------------------------------|-------------------------------|-------------------------------|------------------------|------------------|-------------------|----------------------------|------------------------------------|-------------------|-----------------------------|--------------------------|
| Amin et al. 2011 [30]        | Yes                           | No                            | NR                     | Yes              | No                | Yes                        | Yes                                | No                | No                          | Yes                      |
| Bardwell et al. 2007 [31]    | Yes                           | No                            | NR                     | Yes              | Yes               | No                         | No                                 | Yes               | No                          | No                       |
| Blanco et al. 2005 [34]      | Yes                           | No                            | NR                     | Yes              | NR                | Yes                        | No                                 | No                | No                          | No                       |
| Craig et al. 2012 [35]       | Yes                           | Yes                           | Yes                    | No               | Yes               | Yes                        | No                                 | Yes               | Yes                         | Yes                      |
| Diaferia et al. 2013 [36]    | Yes                           | No                            | NR                     | No               | No                | Yes                        | No                                 | No                | No                          | Yes                      |
| Haensel et al. 2007 [39]     | Yes                           | No                            | NR                     | Yes              | Yes               | No                         | No                                 | No                | No                          | Yes                      |
| Henke et al. 2001* [40]      | Yes                           | No                            | NR                     | Yes              | Yes               | Yes                        | No                                 | No                | No                          | Yes                      |
| Jenkinson et al. 1999 [41]   | Yes                           | Yes                           | Yes                    | Yes              | Yes               | Yes                        | No                                 | Yes               | No                          | Yes                      |
| Lam et al. 2007 [42]         | Yes                           | No                            | NR                     | NR               | NR                | Yes                        | No                                 | Yes               | Yes                         | Yes                      |
| Lee et al. 2012 [43]         | Yes                           | Yes                           | Yes                    | Yes              | Yes               | Yes                        | No                                 | Yes               | No                          | Yes                      |
| Montserrat et al. 2001* [45] | Yes                           | Yes                           | Yes                    | Yes              | Yes               | Yes                        | Yes                                | Yes               | No                          | Yes                      |
| Petri et al. 2008 [47]       | Yes                           | Yes                           | Yes                    | Yes              | Yes               | Yes                        | No                                 | Yes               | Yes                         | Yes                      |
| Redline et al. 1998 [48]     | Yes                           | Yes                           | No                     | No               | NR                | Yes                        | Yes                                | No                | NR                          | Yes                      |
| Ryan et al. 2011 [49]        | Yes                           | Yes                           | Yes                    | No               | Yes               | Yes                        | No                                 | Yes               | No                          | Yes                      |
| Sandberg et al. 2001 [50]    | No                            | Yes                           | Yes                    | No               | NR                | Yes                        | No                                 | No                | No                          | Yes                      |
| Siccoli et al. 2008 [51]     | Yes                           | No                            | NR                     | Yes              | Yes               | Yes                        | No                                 | No                | Yes                         | Yes                      |
| Yu et al. 1999 [53]          | Yes                           | No                            | NR                     | Yes              | NR                | Yes                        | Yes                                | No                | No                          | Yes                      |

\*Crossover period excluded.

NR, not reported or unclear.

doi:10.1371/journal.pmed.1001762.t002

**Table 3.** Assessment of bias of included crossover RCTs on the effect of CPAP or MADs on depression in patients with OSA.

| Study                     | Washout Period (Days) | Inclusion/Exclusion Specified | Method of Randomization Given | Allocation Concealment | Patients Blinded | Assessors Blinded | Reported Loss to Follow-Up | Baseline Difference between Groups | Power Calculation | Intention to Treat Analysis | Funding Source Disclosed |
|---------------------------|-----------------------|-------------------------------|-------------------------------|------------------------|------------------|-------------------|----------------------------|------------------------------------|-------------------|-----------------------------|--------------------------|
| Barnes et al. 2004 [32]   | 14                    | Yes                           | Yes                           | Yes                    | No               | Yes               | Yes                        | No                                 | Yes               | Yes                         | Yes                      |
| Barnes et al. 2002 [33]   | 0                     | Yes                           | Yes                           | Yes                    | Yes              | Yes               | Yes                        | No                                 | Yes               | No                          | Yes                      |
| Engleman et al. 1999 [37] | 0                     | Yes                           | Yes                           | NR                     | NR               | NR                | Yes                        | No                                 | Yes               | No                          | Yes                      |
| Engleman et al. 1998 [38] | 28                    | Yes                           | No                            | NR                     | NR               | NR                | Yes                        | No                                 | No                | No                          | Yes                      |
| Marshall et al. 2005 [44] | 14                    | Yes                           | Yes                           | Yes                    | Yes              | Yes               | Yes                        | No                                 | Yes               | No                          | Yes                      |
| Naismith et al. 2005 [46] | 7                     | Yes                           | Yes                           | Yes                    | Yes              | Yes               | Yes                        | No                                 | No                | No                          | Yes                      |
| Smith et al. 2007 [52]    | 7                     | Yes                           | Yes                           | Yes                    | Yes              | Yes               | Yes                        | No                                 | Yes               | No                          | Yes                      |

NR, not reported or unclear.  
doi:10.1371/journal.pmed.1001762.t003

depression (meta-regression,  $p < 0.001$ ) (Figure 2). In a sensitivity analysis in which the trial by Bardwell et al., which was close to the cutoff value, was re-stratified into the depressed stratum, similar results were found (SMD = 1.635, 95% CI: 0.880, 2.391). The treatment effect of CPAP was also modified by the type of RCT design, with a greater treatment effect observed in parallel arm trials (Figure S1). The pooled SMD for parallel arm RCTs was 0.506 (95% CI: 0.196, 0.817), compared to 0.063 (95% CI: -0.116, 0.243) for trials with crossover design (meta-regression,  $p = 0.076$ ).

The pooled analyses of the WMD in depression score with CPAP treatment versus control for the three most common depression scales are presented in Table 5. Pooled results for subscales of the SF-36, POMSd, and BDI all showed improvements in depressive symptoms with CPAP treatment, although these estimates were not statistically significant. When the SF-36 MCS trials were stratified by the presence or absence of depression at baseline in the trial populations, the trial with a population with depression symptoms at baseline showed a significant improvement in SF-36 MCS score, with a WMD of 10.800 (95% CI: 3.981, 17.619) for the CPAP versus control arm of the trial.

After removal of the studies with baseline depression symptoms that introduced heterogeneity, analysis of the funnel plot did not show asymmetry (Figure S2). Begg's test was non-significant ( $p = 0.317$ ), suggesting that there was no evidence of small study effects that would suggest publication bias.

### Efficacy of MADs for Depression

We identified five trials that reported the effect of MADs on depressive symptoms (440 participants total). Random effects meta-analysis of these five trials of MADs showed a significant improvement in depressive symptoms with MAD treatment compared to controls: SMD = 0.214 (95% CI: 0.026, 0.401) ( $p = 0.025$ ) (Figure 3). The associated  $Q$  statistic did not indicate significant heterogeneity ( $p = 0.830$ ), and  $I^2$  was 0% (95% CI: 0%, 79%), indicating that the observed variability was due to chance or sampling error. The WMD for the three trials using the SF-36 MH subscale was 2.984 (95% CI: -1.812, 7.780), and the WMD for the two trials using the BDI was 0.800 (95% CI: 0.076, 1.524) (Table 6). These WMDs illustrated improvements in depressive symptoms with MADs, although only the WMD for the BDI scale achieved statistical significance.

### Discussion

In this meta-analysis of 22 RCTs—17 including CPAP therapy, three including MAD therapy, and two including both types of therapy—we found a modest benefit of CPAP treatment for improving depressive symptoms in individuals with OSA compared to control. The overall effect size found was representative of a change on the SF-36 MH subscale of +3.12 units [20], while on the BDI this would represent a change of approximately -2.15 units [24,54]. When we stratified trials based on the presence of depression symptoms at baseline, we observed treatment effects representative of +20 units on the SF-36 or -13.8 units on the BDI. As a five-unit change on the BDI scale represents a minimally important clinical difference [55], our results indicate that CPAP treatment in populations with depressive symptoms results in a clinically relevant improvement in depressive symptoms. For study populations with less burden of depressive symptoms, the clinical significance of the changes appears limited (+1.97 units on the SF-36 or -1.36 units on the BDI) and below the threshold of a clinically significant change. We also found that treatment with MADs resulted in improvement in depressive

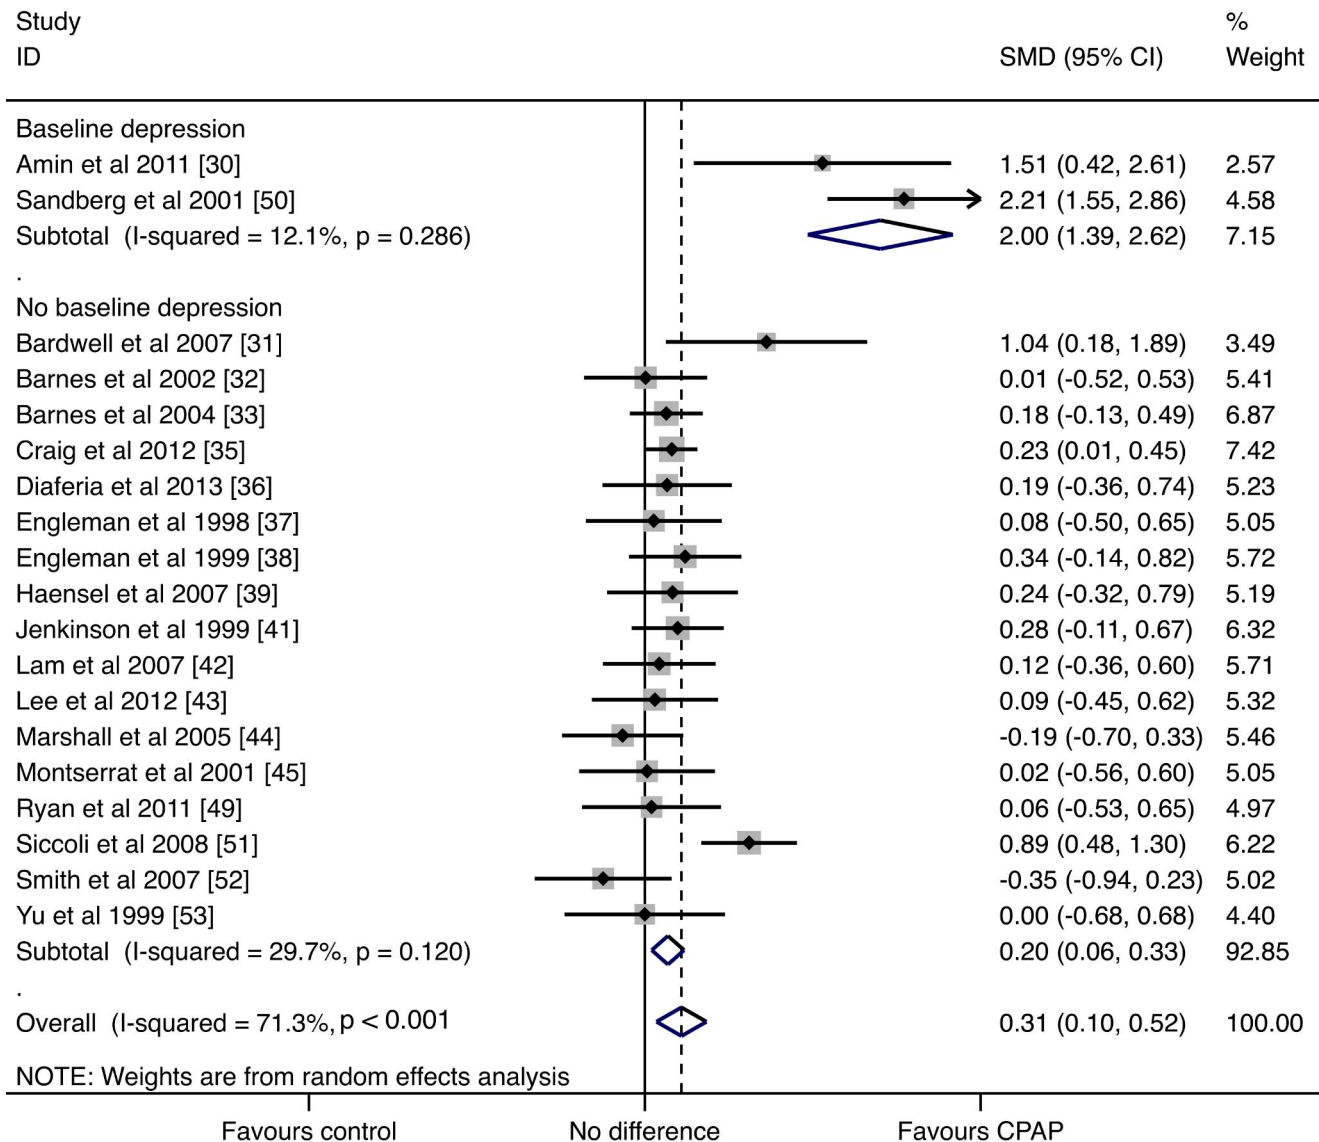

**Figure 2. CPAP studies forest plot.** Data were calculated by a random effects model. Studies were stratified by baseline depression score. Boxes are SMDs, and lines are 95% CIs. The vertical solid line represents no difference between CPAP and control. Values to the right of the solid line favor CPAP benefit. Pooled SMDs and 95% CIs are represented by the diamond shapes.  
doi:10.1371/journal.pmed.1001762.g002

symptoms, with an improvement of +2.1 units on the the SF-36 or -1.6 units on the BDI compared to control. The severity of depression seen in these studies is similar to what might be seen overall in an unselected population referred for OSA testing [5,56].

Our study provides new information on the efficacy of CPAP and MADs for treatment of depressive symptoms in OSA, including results from 11 trials published since the last systematic review of OSA treatment and resolving the unexplained variability in treatment effect reported in the prior systematic review [7]. In contrast to the previous systematic review of OSA therapy, which was limited to an analysis of studies using the HADSd, we found a statistically significant effect of treatment on depression symptoms when all studies and depression scales were included. We found that the majority of the heterogeneity seen in the strength of the treatment effect arose from the presence or not of depression at the

start of treatment in the population studied. Additionally, we found that study design was an important modifier of the treatment effect, with a significant effect identified with use of a parallel arm design but not with use of a crossover design. The attenuation of the treatment effect in crossover trials may relate to insufficient time for recurrence of depressive symptoms between treatment periods, as many trials employed a short or no washout period.

There are limitations to our systematic review. These include methodological limitations within component trials, which included lack of blinding of patients and outcome assessors (which could bias towards finding a benefit), short follow-up duration (which could bias towards the null), and variable adherence with CPAP in some trials (which could attenuate the treatment benefit). However, in stratified analyses and meta-regression, we found that the presence or absence of these features did not significantly



**Table 4.** Meta-regression analysis for effect of CPAP on depressive symptoms.

| CPAP Treatment                     | Pooled SMD (95% CI)   | $I^2$ Statistic (95% CI) | $p$ -Value from Meta-Regression |
|------------------------------------|-----------------------|--------------------------|---------------------------------|
| <b>Overall</b>                     | 0.312 (0.099, 0.525)  | 71 (54, 82)              | —                               |
| <b>RCT design</b>                  |                       |                          |                                 |
| Parallel                           | 0.506 (0.196, 0.817)  | 78 (62, 87)              | 0.076                           |
| Crossover                          | 0.063 (−0.116, 0.243) | 0 (0, 71)                |                                 |
| <b>Depression measurement tool</b> |                       |                          |                                 |
| SF-36 MH or SF-36 MCS              | 0.259 (0.010, 0.509)  | 61 (19, 81)              | 0.725                           |
| Other depression scale             | 0.373 (0.001, 0.745)  | 79 (61, 88)              |                                 |
| <b>OSA severity*</b>               |                       |                          |                                 |
| Mild to moderate                   | 0.457 (0.063, 0.850)  | 84 (70, 91)              | 0.408                           |
| Severe                             | 0.228 (−0.002, 0.458) | 48 (0, 74)               |                                 |
| <b>Blinding</b>                    |                       |                          |                                 |
| No                                 | 0.389 (0.093, 0.686)  | 76 (57, 87)              | 0.508                           |
| Yes                                | 0.214 (−0.112, 0.540) | 67 (29, 84)              |                                 |
| <b>Trial length</b>                |                       |                          |                                 |
| <4 wk                              | 0.310 (−0.107, 0.728) | 58 (0, 83)               | 0.708                           |
| 4–8 wk                             | 0.385 (−0.038, 0.807) | 83 (70, 91)              |                                 |
| 8+ wk                              | 0.202 (0.042, 0.363)  | 0 (0, 85)                |                                 |
| <b>Mean adherence</b>              |                       |                          |                                 |
| <4 h/night                         | 0.472 (0.131, 0.813)  | 80 (65, 88)              | 0.213                           |
| 4+ h/night                         | 0.161 (−0.001, 0.323) | 0 (0, 75)                |                                 |
| Not reported                       | 0.086 (−0.451, 0.623) | —                        |                                 |
| <b>Baseline depression</b>         |                       |                          |                                 |
| No                                 | 0.197 (0.059, 0.334)  | 30 (0, 61)               | <0.001                          |
| Yes                                | 2.004 (1.387, 2.621)  | 12 (—)                   |                                 |

Meta-regression was performed to explore heterogeneity of pooled SMDs in depression scores for CPAP treatment versus control. Positive values indicate a greater improvement in depression symptoms with CPAP treatment than control.  $I^2$  statistic provides a measure of heterogeneity, with lower values indicating less heterogeneity.  $p$ -Values were considered significant with an alpha of 0.10. Dashes indicate values that could not be calculated.

\*Mild to moderate OSA defined as AHI/RDI <30 or ODI<20. Severe OSA defined as AHI/RDI>30 or ODI>20.

doi:10.1371/journal.pmed.1001762.t004

modify the effect of CPAP treatment on depression. The completeness of reporting of these studies may also be a significant limitation. We were able to calculate point estimates and variance estimates for treatment effects according to recommended methods for most trials; however, two trials of CPAP provided insufficient data for inclusion in the meta-analysis. One reported that the result of CPAP treatment was non-significant but did not

provide a numerical comparison [40], and the other did not report anything other than that the testing was done [57]. A further limitation is the quality of normative values for depression questionnaires. However, our findings from a sensitivity analysis in which we re-stratified into the group of trials with baseline depression one trial with a baseline depression score that fell just below the threshold for a depressed population suggest that this

**Table 5.** Pooled weighted mean differences in depression score for CPAP treatment.

| Depression Measure               | Number of Trials | Pooled WMD (95% CI)    | $I^2$ Statistic (95% CI) |
|----------------------------------|------------------|------------------------|--------------------------|
| SF-36 MH                         | 9                | 1.914 (−1.366, 5.194)  | 57 (10, 80)              |
| SF-36 MCS—baseline depression    | 1                | 10.800 (3.981, 17.619) | —                        |
| SF-36 MCS—no baseline depression | 5                | 2.039 (−1.710, 5.789)  | 77 (43, 90)              |
| POMSd                            | 3                | 0.581 (−1.253, 2.415)  | 0 (0,90)                 |
| BDI                              | 2                | 0.997 (−0.666, 2.660)  | 0 (—)                    |

WMDs were calculated for studies using the same measure of depressive symptoms. The most common depression scales were included in this analysis. The pooled estimated WMD is in the units of the scale used. Positive values indicate that a benefit of CPAP was seen. Dashes indicate values that could not be calculated.

doi:10.1371/journal.pmed.1001762.t005

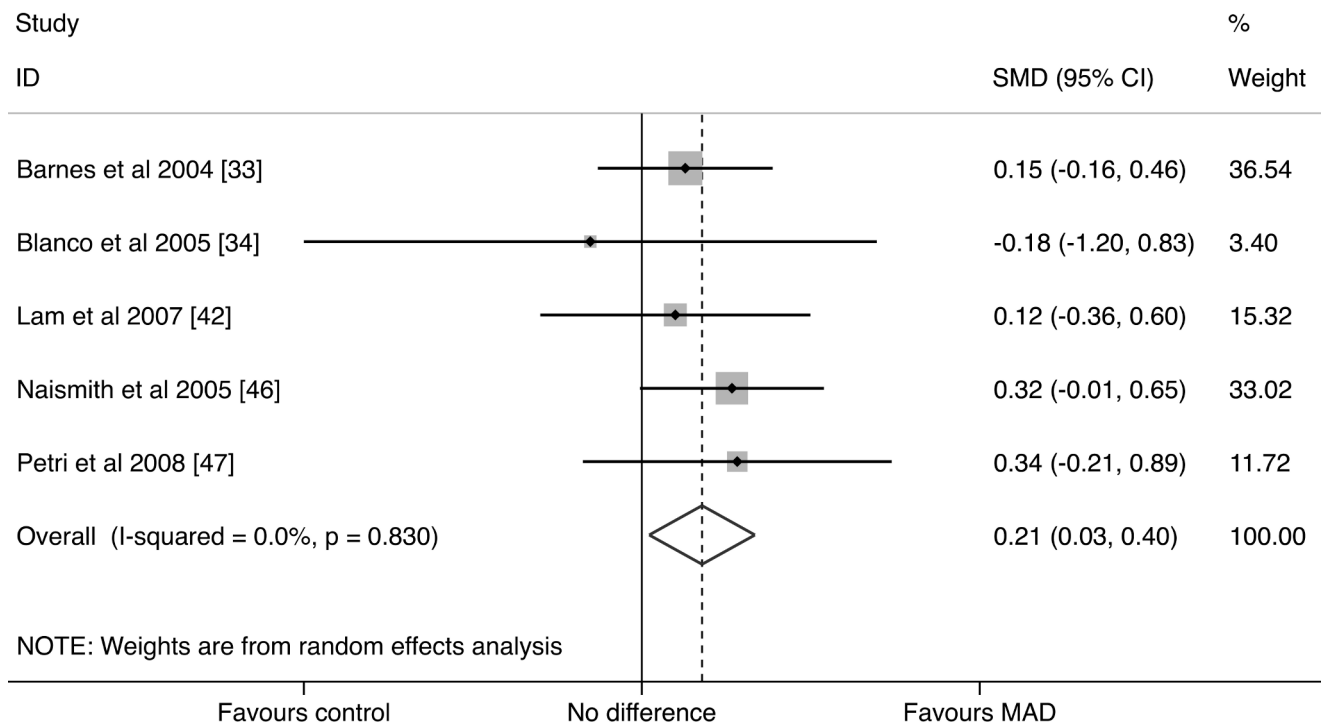

**Figure 3. MAD studies forest plot.** Data were calculated by a random effects model. Boxes are SMDs, and lines are 95% CIs. The vertical solid line represents no difference between MAD and control. Values to the right of the solid line favor MAD benefit. Pooled SMD and 95% CI is represented by the diamond shape.

doi:10.1371/journal.pmed.1001762.g003

issue does not invalidate our findings. Moreover, the reporting of use of antidepressant medications in the component trials was incomplete. Only six trials excluded participants using antidepressants, and one excluded use of benzodiazepines, but the remainder did not report the use of antidepressant medications, and none reported whether antidepressants were initiated during the study period. If patients in the CPAP or MAD treatment groups were preferentially started on antidepressants, this could bias the trials towards showing a benefit with CPAP or MADs. Another limitation is that we only identified trials that used dimensional depression scales as opposed to structured or semi-structured diagnostic interviews to measure depression outcomes. These scales include questions assessing sleep quality; however, this usually comprises only one question on the scale. Without detailed patient response data, it is not possible to exclude the possibility that the improvement in depressive symptom score is due to improvement in sleep-related symptoms alone. However, the

larger treatment effect on depressive symptoms seen among the two trials that included patients with a greater burden of depression at baseline suggests that improvement in sleepiness alone is unlikely to completely explain the changes in depression scores in these trials. Future trials in clinically depressed populations are needed, with attention to what specific symptoms of depression have improved with treatment of OSA.

In conclusion, this systematic review summarizes the available literature on OSA treatment, demonstrating that both CPAP and MAD treatment result in small improvements in depressive symptoms based on questionnaires. Our results illustrate that the greatest benefit of CPAP treatment on depressive symptoms may occur in populations with worse depression scores at baseline. Given the limitations of studies included in this analysis, additional high-quality RCTs would be helpful to confirm the finding that treatment of co-morbid OSA can improve symptoms in patients with clinically significant depression, in particular that diagnosed

**Table 6.** Pooled weighted mean differences in depression score for MAD treatment.

| Depression Measure | Number of Trials | Pooled WMD (95% CI)   | I <sup>2</sup> Statistic (95% CI) |
|--------------------|------------------|-----------------------|-----------------------------------|
| SF-36 MH           | 3                | 2.984 (-1.812, 7.780) | 0 (0, 90)                         |
| BDI                | 2                | 0.800 (0.076, 1.524)  | 0 (—)                             |

WMDs were calculated for studies using the same measure of depressive symptoms. The pooled estimated WMD is in the units of the scale used. Positive values indicate that a benefit of MAD treatment was seen. The most common depression scales were included in this analysis. Dashes indicate values that could not be calculated.

doi:10.1371/journal.pmed.1001762.t006

by standardized clinical interview. Additionally, a comparison of OSA therapy with depression treatments such as antidepressants or psychotherapy would elaborate on an appropriate treatment algorithm for patients with both OSA and depression.

## Supporting Information

**Figure S1 CPAP study forest plot stratified by study design.** Data were calculated using a random effects model. Studies were stratified by study design: parallel versus crossover. Boxes are SMDs, and lines are 95% CIs. The vertical solid line represents no difference between CPAP and control. Values to the right of the solid line favor CPAP benefit. Pooled SMDs and 95% CIs are represented by the diamond shapes. (TIF)

**Figure S2 Funnel plot of published studies.** The standard error (s.e.) of the SMD is plotted versus the SMD. Larger studies cluster at the top of the pyramid, while smaller studies are in the outer lower

## References

- Somers VK, White DP, Amin R, Abraham WT, Costa F, et al. (2008) Sleep apnea and cardiovascular disease: an American Heart Association/American College of Cardiology Foundation scientific statement from the American Heart Association Council for High Blood Pressure Research Professional Education Committee, Council on Clinical Cardiology, Stroke Council, and Council on Cardiovascular Nursing. In collaboration with the National Heart, Lung, and Blood Institute National Center on Sleep Disorders Research (National Institutes of Health). *Circulation* 118: 1080–1111.
- Pelletier-Fleury N, Meslier N, Gagnadoux F, Person C, Rakotonanahary D, et al. (2004) Economic arguments for the immediate management of moderate-to-severe obstructive sleep apnoea syndrome. *Eur Respir J* 23: 53–60.
- Eckert DJ, Malhotra A (2008) Pathophysiology of adult obstructive sleep apnea. *Proc Am Thorac Soc* 5: 144–153.
- Fleetham J, Ayas N, Bradley D, Ferguson K, Fitzpatrick M, et al. (2006) Canadian Thoracic Society guidelines: diagnosis and treatment of sleep disordered breathing in adults. *Can Respir J* 13: 387–392.
- Harris M, Glozier N, Ratnavadev R, Grunstein RR (2009) Obstructive sleep apnea and depression. *Sleep Med Rev* 13: 437–444.
- Bixler EO, Vgontzas AN, Lin HM, Calhoun SL, Vela-Bueno A, et al. (2005) Excessive daytime sleepiness in a general population sample: the role of sleep apnea, age, obesity, diabetes, and depression. *J Clin Endocrinol Metab* 90: 4510–4515.
- Giles TL, Lasserson TJ, Smith BJ, White J, Wright J, et al. (2006) Continuous positive airways pressure for obstructive sleep apnoea in adults. *Cochrane Database Syst Rev* 2006: CD001106.
- Marin JM, Carrizo SJ, Vicente E, Agusti AG (2005) Long-term cardiovascular outcomes in men with obstructive sleep apnoea-hypopnoea with or without treatment with continuous positive airway pressure: an observational study. *Lancet* 365: 1046–1053.
- Marin JM, Soriano JB, Carrizo SJ, Boldova A, Celli BR (2010) Outcomes in patients with chronic obstructive pulmonary disease and obstructive sleep apnea: the overlap syndrome. *Am J Respir Crit Care Med* 182: 325–331.
- Martinez-Garcia MA, Soler-Cataluna JJ, Ejarque-Martinez L, Soriano Y, Roman-Sanchez P, et al. (2009) Continuous positive airway pressure treatment reduces mortality in patients with ischemic stroke and obstructive sleep apnea: a 5-year follow-up study. *Am J Respir Crit Care Med* 180: 36–41.
- Hoffstein V (2007) Review of oral appliances for treatment of sleep-disordered breathing. *Sleep Breath* 11: 1–22.
- Moher D, Liberati A, Tetzlaff J, Altman DG, Group P (2009) Preferred reporting items for systematic reviews and meta-analyses: the PRISMA statement. *Open Med* 3: e123–e130.
- Beck AT, Steer RA, Ball R, Ranieri W (1996) Comparison of Beck Depression Inventories -IA and -II in psychiatric outpatients. *J Pers Assess* 67: 588–597.
- Zigmond AS, Snaith RP (1983) The hospital anxiety and depression scale. *Acta Psychiatr Scand* 67: 361–370.
- Montgomery SA, Asberg M (1979) A new depression scale designed to be sensitive to change. *Br J Psychiatry* 134: 382–389.
- Nyenhuis DL, Yamamoto C, Luchetta T, Terrien A, Parmentier A (1999) Adult and geriatric normative data and validation of the profile of mood states. *J Clin Psychol* 55: 79–86.
- Yesavage JA, Brink TL, Rose TL, Lum O, Huang V, et al. (1982) Development and validation of a geriatric depression screening scale: a preliminary report. *J Psychiatr Res* 17: 37–49.
- Derogatis LR, Melisaratos N (1983) The Brief Symptom Inventory: an introductory report. *Psychol Med* 13: 595–605.
- Roberts RE, Vernon SW (1983) The Center for Epidemiologic Studies Depression Scale: its use in a community sample. *Am J Psychiatry* 140: 41–46.
- Ware JE Jr, Sherbourne CD (1992) The MOS 36-item short-form health survey (SF-36). I. Conceptual framework and item selection. *Med Care* 30: 473–483.
- InterTASC Information Specialists' Sub-Group (2014) The InterTASC Information Specialists' Sub-Group search filter resource. Available: <https://sites.google.com/a/york.ac.uk/issg-search-filters-resource/home>. Accessed 21 October 2014.
- Higgins JPT, Green S, editors(2009) *Cochrane handbook for systematic reviews of interventions*, version 5.0.2. The Cochrane Collaboration.
- Higgins JPT, Altman DG, Gotzsche PC, Juni P, Moher D, et al. (2011) The Cochrane Collaboration's tool for assessing risk of bias in randomised trials. *BMJ* 343: d5928.
- Kjaergaard M, Arfwedson Wang CE, Waterloo K, Jorde R (2014) A study of the psychometric properties of the Beck Depression Inventory-II, the Montgomery and Asberg Depression Rating Scale, and the Hospital Anxiety and Depression Scale in a sample from a healthy population. *Scand J Psychol* 55: 83–89.
- Choi Y, Mayer TG, Williams MJ, Gatchel RJ (2014) What is the best screening test for depression in chronic spinal pain patients? *Spine J* 14: 1175–1182.
- Dennis M, Kadri A, Coffey J (2012) Depression in older people in the general hospital: a systematic review of screening instruments. *Age Ageing* 41: 148–154.
- Lewinsohn PM, Seeley JR, Roberts RE, Allen NB (1997) Center for Epidemiologic Studies Depression Scale (CES-D) as a screening instrument for depression among community-residing older adults. *Psychol Aging* 12: 277–287.
- Wyrwich KW, Yu H (2011) Validation of POMS questionnaire in postmenopausal women. *Qual Life Res* 20: 1111–1121.
- Kelly WK, Kelly WK, Halabi S (2010) *Oncology clinical trials: successful design, conduct, and analysis*. New York: Demos Medical Publishing.
- Amin MM, Gold MS, Broderick JE, Gold AR (2011) The effect of nasal continuous positive airway pressure on the symptoms of Gulf War illness. *Sleep Breath* 15: 579–587.
- Bardwell WA, Norman D, Ancoli-Israel S, Loreda JS, Lowery A, et al. (2007) Effects of 2-week nocturnal oxygen supplementation and continuous positive airway pressure treatment on psychological symptoms in patients with obstructive sleep apnea: a randomized placebo-controlled study. *Behav Sleep Med* 5: 21–38.
- Barnes M, Houston D, Worsnop CJ, Neill AM, Mykityn IJ, et al. (2002) A randomized controlled trial of continuous positive airway pressure in mild obstructive sleep apnea. *Am J Respir Crit Care Med* 165: 773–780.
- Barnes M, McEvoy RD, Banks S, Tarquinio N, Murray CG, et al. (2004) Efficacy of positive airway pressure and oral appliance in mild to moderate obstructive sleep apnea. *Am J Respir Crit Care Med* 170: 656–664.
- Blanco J, Zamarron C, Abeleira Pazos MT, Lamela C, Suarez Quintanilla D (2005) Prospective evaluation of an oral appliance in the treatment of obstructive sleep apnea syndrome. *Sleep Breath* 9: 20–25.
- Craig SE, Kohler M, Nicoll D, Bratton DJ, Nunn A, et al. (2012) Continuous positive airway pressure improves sleepiness but not calculated vascular risk in patients with minimally symptomatic obstructive sleep apnoea: the MOSAIC randomised controlled trial. *Thorax* 67: 1090–1096.
- Diaferia G, Badke L, Santos-Silva R, Bommarito S, Tufik S, et al. (2013) Effect of speech therapy as adjunct treatment to continuous positive airway pressure on the quality of life of patients with obstructive sleep apnea. *Sleep Med* 14: 628–635.
- Engleman HM, Martin SE, Kingshott RN, Mackay TW, Deary IJ, et al. (1998) Randomised placebo controlled trial of daytime function after continuous positive airway pressure (CPAP) therapy for the sleep apnoea/hypopnoea syndrome. *Thorax* 53: 341–345.

38. Engleman HM, Kingshott RN, Wraith PK, Mackay TW, Deary IJ, et al. (1999) Randomized placebo-controlled crossover trial of continuous positive airway pressure for mild sleep apnea/hypopnea syndrome. *Am J Respir Crit Care Med* 159: 461–467.
39. Haensel A, Norman D, Natarajan L, Bardwell WA, Ancoli-Israel S, et al. (2007) Effect of a 2 week CPAP treatment on mood states in patients with obstructive sleep apnea: a double-blind trial. *Sleep Breath* 11: 239–244.
40. Henke KG, Grady JJ, Kuna ST (2001) Effect of nasal continuous positive airway pressure on neuropsychological function in sleep apnea-hypopnea syndrome. A randomized, placebo-controlled trial. *Am J Respir Crit Care Med* 163: 911–917.
41. Jenkinson C, Davies RJ, Mullins R, Stradling JR (1999) Comparison of therapeutic and subtherapeutic nasal continuous positive airway pressure for obstructive sleep apnoea: a randomised prospective parallel trial. *Lancet* 353: 2100–2105.
42. Lam B, Sam K, Mok WYW, Cheung MT, Fong DYT, et al. (2007) Randomised study of three non-surgical treatments in mild to moderate obstructive sleep apnoea. *Thorax* 62: 354–359.
43. Lee IS, Bardwell W, Ancoli-Israel S, Loreda JS, Dimsdale JE (2012) Effect of three weeks of continuous positive airway pressure treatment on mood in patients with obstructive sleep apnoea: a randomized placebo-controlled study. *Sleep Med* 13: 161–166.
44. Marshall NS, Neill AM, Campbell AJ, Sheppard DS (2005) Randomised controlled crossover trial of humidified continuous positive airway pressure in mild obstructive sleep apnoea. *Thorax* 60: 427–432.
45. Montserrat JM, Ferrer M, Hernandez L, Farre R, Vilagut G, et al. (2001) Effectiveness of CPAP treatment in daytime function in sleep apnea syndrome: a randomized controlled study with an optimized placebo. *Am J Respir Crit Care Med* 164: 608–613.
46. Naismith SL, Winter VR, Hickie IB, Cistulli PA (2005) Effect of oral appliance therapy on neurobehavioral functioning in obstructive sleep apnea: a randomized controlled trial. *J Clin Sleep Med* 1: 374–380.
47. Petri N, Svanholt P, Solow B, Wildschiodt G, Winkel P (2008) Mandibular advancement appliance for obstructive sleep apnoea: results of a randomised placebo controlled trial using parallel group design. *J Sleep Res* 17: 221–229.
48. Redline S, Adams N, Strauss ME, Roebuck T, Winters M, et al. (1998) Improvement of mild sleep-disordered breathing with CPAP compared with conservative therapy. *Am J Respir Crit Care Med* 157: 858–865.
49. Ryan CM, Bayley M, Green R, Murray BJ, Bradley TD (2011) Influence of continuous positive airway pressure on outcomes of rehabilitation in stroke patients with obstructive sleep apnea. *Stroke* 42: 1062–1067.
50. Sandberg O, Franklin KA, Bucht G, Eriksson S, Gustafson Y (2001) Nasal continuous positive airway pressure in stroke patients with sleep apnoea: a randomized treatment study. *Eur Respir J* 18: 630–634.
51. Siccoli MM, Pepperell JC, Kohler M, Craig SE, Davies RJ, et al. (2008) Effects of continuous positive airway pressure on quality of life in patients with moderate to severe obstructive sleep apnea: data from a randomized controlled trial. *Sleep* 31: 1551–1558.
52. Smith LA, Vennelle M, Gardner RS, McDonagh TA, Denvir MA, et al. (2007) Auto-titrating continuous positive airway pressure therapy in patients with chronic heart failure and obstructive sleep apnoea: a randomized placebo-controlled trial. *Eur Heart J* 28: 1221–1227.
53. Yu BH, Ancoli-Israel S, Dimsdale JE (1999) Effect of CPAP treatment on mood states in patients with sleep apnea. *J Psychiatr Res* 33: 427–432.
54. Steer RA, Clark DA, Beck AT, Ranieri WF (1999) Common and specific dimensions of self-reported anxiety and depression: the BDI-II versus the BDI-IA. *Behav Res Ther* 37: 183–190.
55. Smarr KL, Keefer AL (2011) Measures of depression and depressive symptoms: Beck Depression Inventory-II (BDI-II), Center for Epidemiologic Studies Depression Scale (CES-D), Geriatric Depression Scale (GDS), Hospital Anxiety and Depression Scale (HADS), and Patient Health Questionnaire-9 (PHQ-9). *Arthritis Care Res (Hoboken)* 63 (Suppl 11): S454–S466.
56. Douglas N, Young A, Roebuck T, Ho S, Miller BR, et al. (2013) Prevalence of depression in patients referred with snoring and obstructive sleep apnoea. *Intern Med J* 43: 630–634.
57. Redline S, Adams N, Strauss ME, Roebuck T, Winters M, et al. (1998) Improvement of mild sleep-disordered breathing with CPAP compared with conservative therapy. *Am J Respir Crit Care Med* 157: 858–865.

## Editors' Summary

**Background.** Obstructive sleep apnea (OSA) is a sleep-related breathing disorder that is particularly common among middle-aged and elderly people, although most are unaware that they have the condition. It is characterized by the occurrence of numerous brief (ten seconds or so) breathing interruptions during sleep. These "apneas" occur when relaxation of the upper airway muscles decreases airflow, which lowers the level of oxygen in the blood. Consequently, affected individuals are frequently aroused from deep sleep as they struggle to breathe. Symptoms of OSA include loud snoring and daytime sleepiness. Treatments include lifestyle changes such as losing weight (excess fat around the neck increases airway collapse) and smoking cessation. Mild to moderate OSA can also be treated using a mandibular advancement device (MAD), a "splint" that fits inside the mouth and pushes the jaw and tongue forward to increase the space at the back of the throat and reduce airway narrowing. For severe OSA, doctors recommend continuous positive airway pressure (CPAP), in which a machine blows pressurized air into the airway through a facemask to keep it open.

**Why Was This Study Done?** OSA is a serious condition that is associated with an increased risk of illness and death. Clinical depression (long-lasting, overwhelming feelings of sadness and hopelessness), for example, is common among people with OSA. The interaction between these frequently co-morbid (co-existing) conditions is complex. The sleep disruption and weight gain that are often associated with depression could cause or worsen OSA. Conversely, OSA could trigger depression by causing sleep disruption and by inducing cognitive changes (changes in thinking) by intermittently starving the brain of oxygen. If the latter scenario is correct, then treating OSA with CPAP or MADs might improve depressive symptoms. Several trials have investigated this possibility, but their results have been equivocal. Here, the researchers undertake a systematic review and meta-analysis of randomized controlled trials that have examined the effect of CPAP or MADs on depressive symptoms in patients with OSA to find out whether treating co-morbid OSA in patients with depression can help to treat depression. A randomized controlled trial compares the outcomes of individuals chosen to receive different interventions through the play of chance, a systematic review uses predefined criteria to identify all the research on a given topic, and meta-analysis uses statistical methods to combine the results of several studies.

**What Did the Researchers Do and Find?** The researchers identified 22 trials that investigated the effects of CPAP or MAD treatment in patients with OSA and that measured depressive symptoms before and after treatment. Meta-analysis of the results of 19 trials that provided information about the effect of CPAP on depressive symptoms indicated that CPAP improved depressive symptoms compared to the control intervention (usually sham CPAP) but revealed

considerable heterogeneity (variability) between trials. Notably, CPAP treatment resulted in a greater improvement in depressive symptoms in trials in which there was a high prevalence of depression at baseline than in trials in which there was a low prevalence of depression at baseline. Moreover, the magnitude of this improvement in depressive symptoms in trials with a high prevalence of depression at baseline was large enough to be clinically relevant. Meta-analysis of five trials that provided information about the effect of MADs on depressive symptoms indicated that MADs also improved depressive symptoms compared to the control intervention (sham MAD).

**What Do These Findings Mean?** These findings suggest that both CPAP and MAD treatment for OSA can result in modest improvements in depressive symptoms and that populations with high initial levels of depressive symptoms may reap the greatest benefits of CPAP treatment. These findings give no indication of the efficacy of CPAP and MADs compared to standard treatments for depression such as antidepressant medications. Moreover, their accuracy may be limited by methodological limitations within the trials included in the meta-analyses reported here. For example, the questionnaires used to measure depression in these trials were not validated for use in people with OSA. Further high-quality randomized controlled trials are therefore needed to confirm the findings of this systematic review and meta-analysis. For now, however, these findings suggest that the use of CPAP and MADs may help improve depressive symptoms among people with OSA.

**Additional Information.** Please access these websites via the online version of this summary at <http://dx.doi.org/10.1371/journal.pmed.1001762>.

- The US National Heart, Lung, and Blood Institute has information (including several videos) about sleep apnea (in English and Spanish)
- The UK National Health Service Choices website provides information and personal stories about obstructive sleep apnea and depression
- The not-for-profit American Sleep Apnea Association provides detailed information about sleep apnea for patients and healthcare professionals, including personal stories about the condition
- The US National Institute of Mental Health provides information on all aspects of depression (in English and Spanish)
- The Anxiety and Depression Association of America provides information about sleep disorders
- The MedlinePlus encyclopedia has a page on obstructive sleep apnea; MedlinePlus provides links to further information and advice about obstructive sleep apnea and about depression (in English and Spanish)
